# Supplementary material
Source: MDPI journal article supplement (https://www.mdpi.com/2073-4352/8/9/352)
Supplement: s1 [file s1]

# 1 Improved Solubility of Vortioxetine Using C2-C4 2 Straight-chain Dicarboxylic Acid Salt Hydrates

3 Lei Gao, Xian-Rui Zhang\*, Shao-Ping Yang, Juan-Juan Liu, and Chao-Jie Chen

4

5 **Table S1.** Torsion angles (°) variation of VOT molecules extracted from crystal structures

| Compounds                | A-B     | A-C     |
|--------------------------|---------|---------|
| VOT                      | 5.8(3)  | 34.8(3) |
| VOT-OA                   | 18.3(4) | 20.9(4) |
| VOT-MA-H <sub>2</sub> O  | 8.4(3)  | 43.8(3) |
| VOT-SUA-H <sub>2</sub> O | 4.6(4)  | 41.7(4) |

6

**Table S2.** Preparation of VOT salts

| VOT (mg) | Coformer (mg) | Solvent                           | Condition                  | Solid form               |
|----------|---------------|-----------------------------------|----------------------------|--------------------------|
| 20       | 6 mg OA       | methanol                          | room temperature           | VOT-OA                   |
| 20       | 6 mg OA       | ethanol                           | room temperature           | VOT-OA                   |
| 20       | 6 mg OA       | acetonitrile                      | room temperature           | VOT-OA                   |
| 20       | 6 mg OA       | acetone                           | room temperature           | VOT-OA                   |
| 20       | 6 mg OA       | acetone-water (3:1,<br>v/v)       | room temperature           | VOT-OA                   |
| 20       | 7 mg MA       | methanol                          | room temperature           | oily matter (failed)     |
| 20       | 7 mg MA       | ethanol                           | room temperature           | oily matter (failed)     |
| 20       | 7 mg MA       | acetonitrile                      | room temperature           | oily matter (failed)     |
| 20       | 7 mg MA       | chloroform                        | room temperature           | oily matter (failed)     |
| 20       | 7 mg MA       | acetone                           | room temperature           | white powder (failed)    |
| 20       | 7 mg MA       | acetone-water (1:1,<br>v/v)       | room temperature           | white powder (failed)    |
| 20       | 7 mg MA       | acetone-toluence<br>(1:1, v/v)    | 35 % humidity<br>condition | VOT-MA-H <sub>2</sub> O  |
| 20       | 8 mg SUA      | methanol                          | room temperature           | white powder (failed)    |
| 20       | 8 mg SUA      | ethanol                           | room temperature           | white powder (failed)    |
| 20       | 8 mg SUA      | acetonitrile                      | room temperature           | white powder (failed)    |
| 20       | 8 mg SUA      | acetone                           | room temperature           | white powder (failed)    |
| 20       | 8 mg SUA      | chloroform-methanol<br>(2:1, v/v) | room temperature           | white powder (failed)    |
| 20       | 8 mg SUA      | methanol-toluence<br>(1:1, v/v)   | room temperature           | white powder (failed)    |
| 20       | 8 mg SUA      | acetonitrile-water<br>(2:1, v/v)  | room temperature           | white powder (failed)    |
| 20       | 8 mg SUA      | methanol-water<br>(2:1, v/v)      | room temperature           | VOT-SUA-H <sub>2</sub> O |

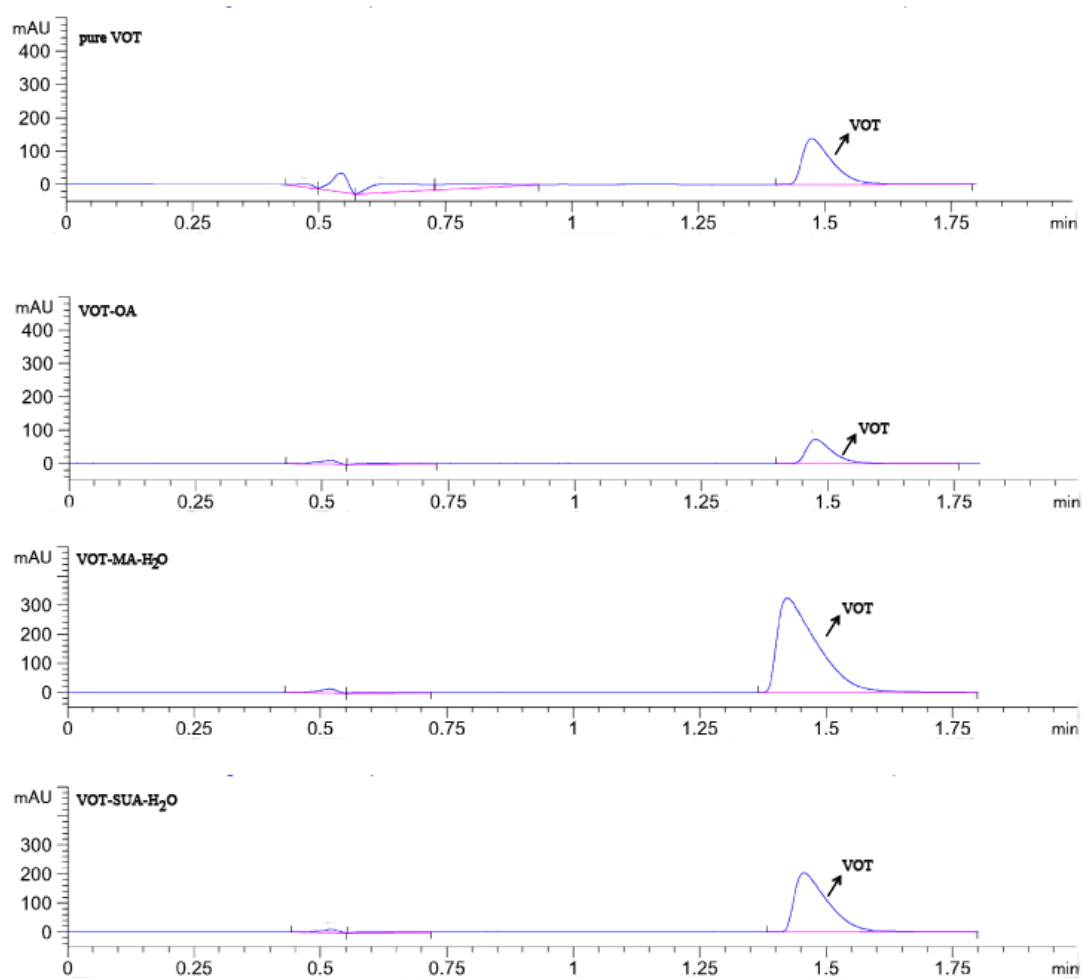

7  
8

**Figure S1.** The HPLC graphs of VOT and its salts.

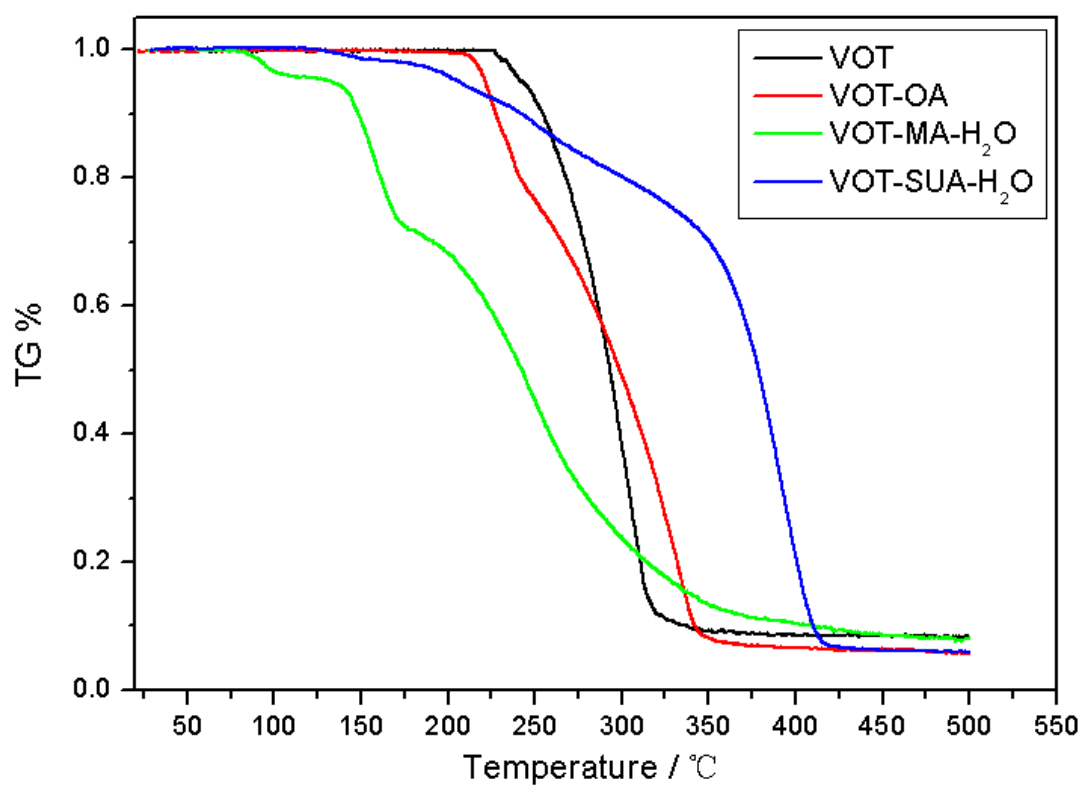

9  
10  
11

Figure S2. The TGA plots of VOT and its salts.

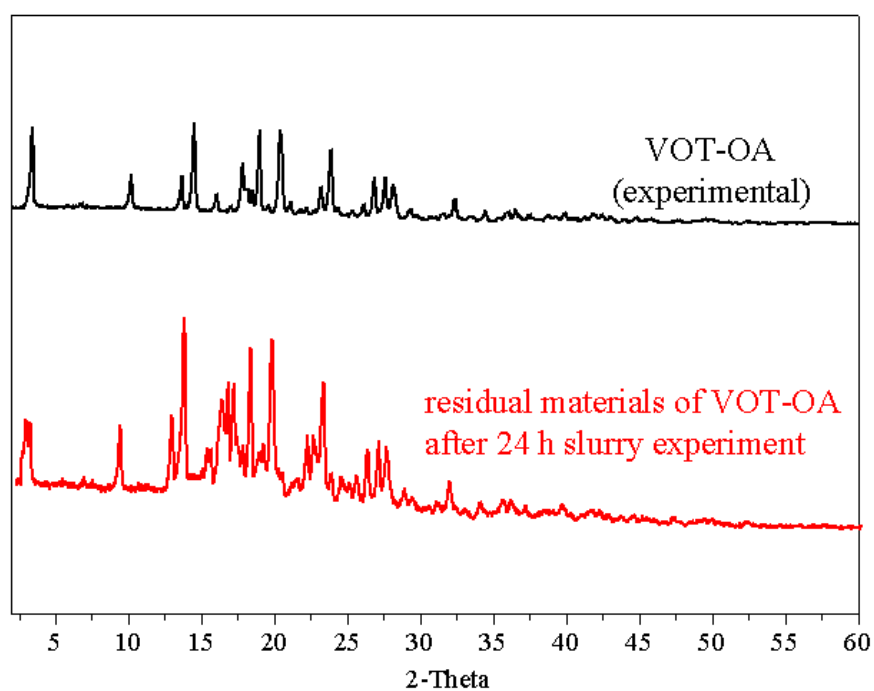

12  
13  
14

Figure S3. Comparison PXRD patterns of VOT-OA and its residual materials after 24h solubility in aqueous medium.

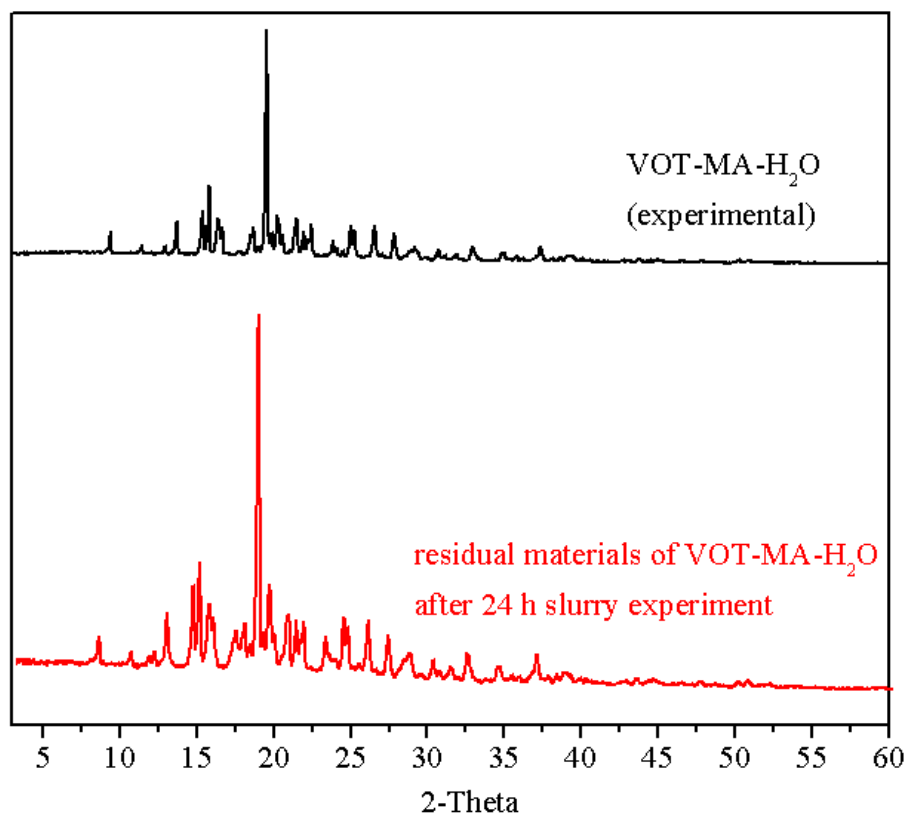

15

16 **Figure S4.** Comparison PXRD patterns of VOT-MA-H<sub>2</sub>O and its residual materials after 24h  
17 solubility in aqueous medium.

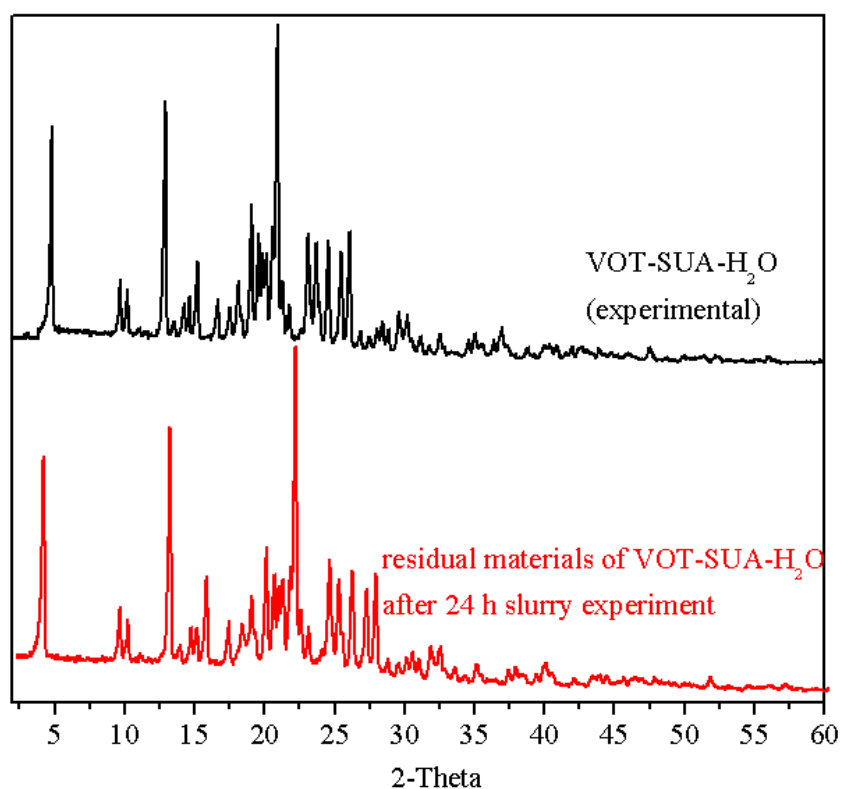

18

19 **Figure S5.** Comparison PXRD patterns of VOT-SUA-H<sub>2</sub>O and its residual materials after 24h  
20 solubility in aqueous medium.
